# Supplementary material for: Effect of Anoxic Atmosphere on the Physicochemical and Pelletization Properties of Pinus massoniana Sawdust during Storage
Source: MDPI journal article supplement (doi:10.3390/ijerph20010791), 2022-12-31
Supplement: s1 [file s1]

---

**Table S1 Alpha diversity index of PS, PS-25, and PS-S-25.**

| Sample    | Chao1   | coverage | Shannon | Simpson  |
|-----------|---------|----------|---------|----------|
| PS-1      | 301.448 | 1.00     | 4.64962 | 0.857271 |
| PS-2      | 232.093 | 1.00     | 5.58035 | 0.958484 |
| PS-3      | 264.45  | 1.00     | 4.54754 | 0.909132 |
| PS-4      | 352.956 | 1.00     | 5.5054  | 0.938808 |
| PS-5      | 272.499 | 1.00     | 5.2818  | 0.938011 |
| PS-6      | 367.717 | 1.00     | 6.33909 | 0.975474 |
| PS-25-1   | 200.551 | 1.00     | 3.84212 | 0.840311 |
| PS-25-2   | 271.536 | 1.00     | 4.06688 | 0.836964 |
| PS-25-3   | 273.166 | 1.00     | 4.9836  | 0.930516 |
| PS-25-4   | 348.165 | 1.00     | 5.81863 | 0.960603 |
| PS-25-5   | 120.066 | 1.00     | 1.55693 | 0.371674 |
| PS-25-6   | 292.061 | 1.00     | 5.06545 | 0.93601  |
| PS-S-25-1 | 274.622 | 1.00     | 4.58696 | 0.889002 |
| PS-S-25-2 | 317.625 | 1.00     | 4.90735 | 0.874864 |
| PS-S-25-3 | 234.589 | 1.00     | 4.00043 | 0.836443 |
| PS-S-25-4 | 183.949 | 1.00     | 1.99579 | 0.454452 |
| PS-S-25-5 | 319.719 | 1.00     | 5.87671 | 0.962188 |
| PS-S-25-6 | 279.658 | 1.00     | 4.92238 | 0.925322 |

---

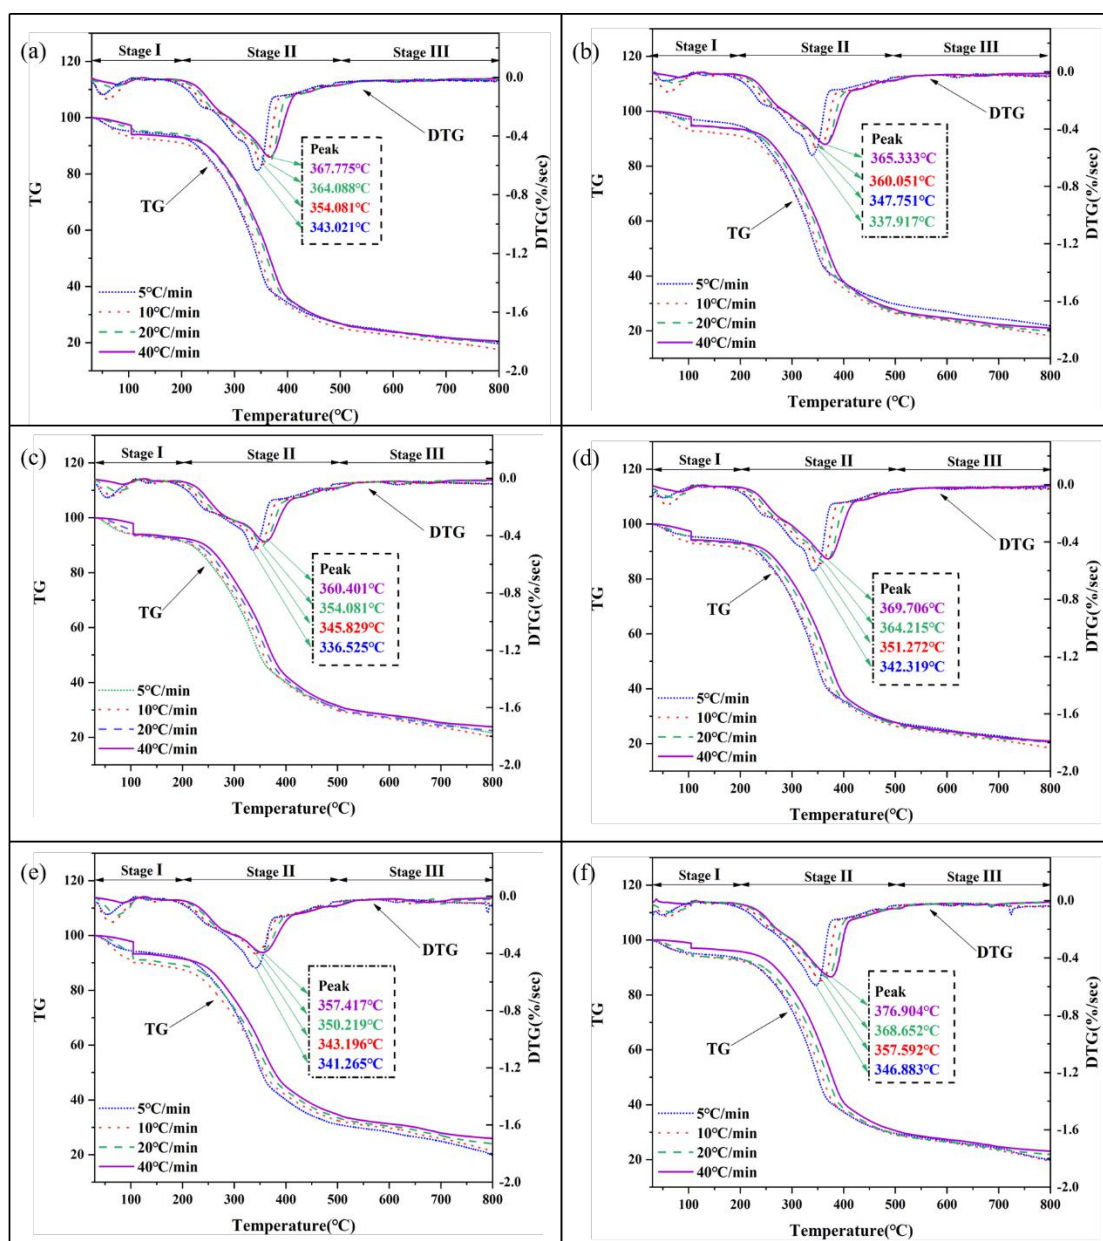

Figure.S1. TG and DTG curves of PS-4, PS-25, PS-35, PS-S-4, PS-S-25, and PS-S-35.

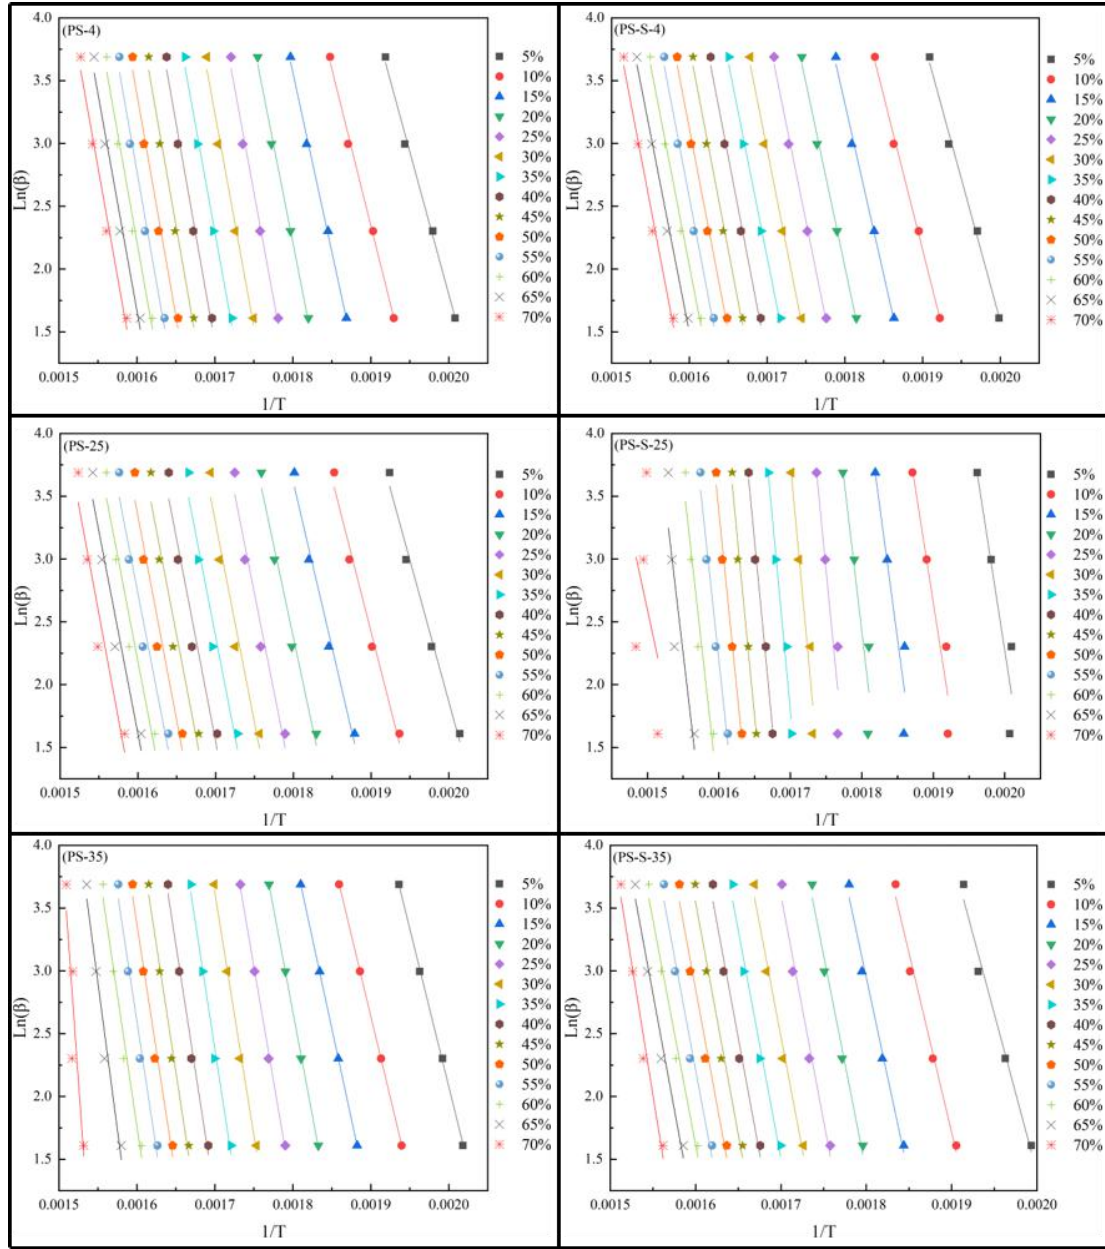

Figure.S2. FWO model of PS-4, PS-25, PS-35, PS-S-4, PS-S-25, and PS-S-35.
